# Supplementary material for: Cross-Talk Between Intestinal Microbiota and Host Gene Expression in Gilthead Sea Bream (Sparus aurata) Juveniles: Insights in Fish Feeds for Increased Circularity and Resource Utilization
Source: Frontiers journal article supplement (doi:10.3389/fphys.2021.748265), 2021-10-05

**Supplementary Figure 4:** Linear discriminant analysis effect size (LEfSe) performed with the discriminant OTUs (VIP  $\geq 1$ ) from the PLS-DA analysis. In (A) the OTUs most likely to drive differences in CTRL (black), NoPAP (red) and PAP (green) groups are represented in Log<sub>10</sub> LDA score. These results are represented in a cladogram in (B) with the OTU classification at the level of phylum, class, order, family, genus and species shown from the inside to the outside.

A

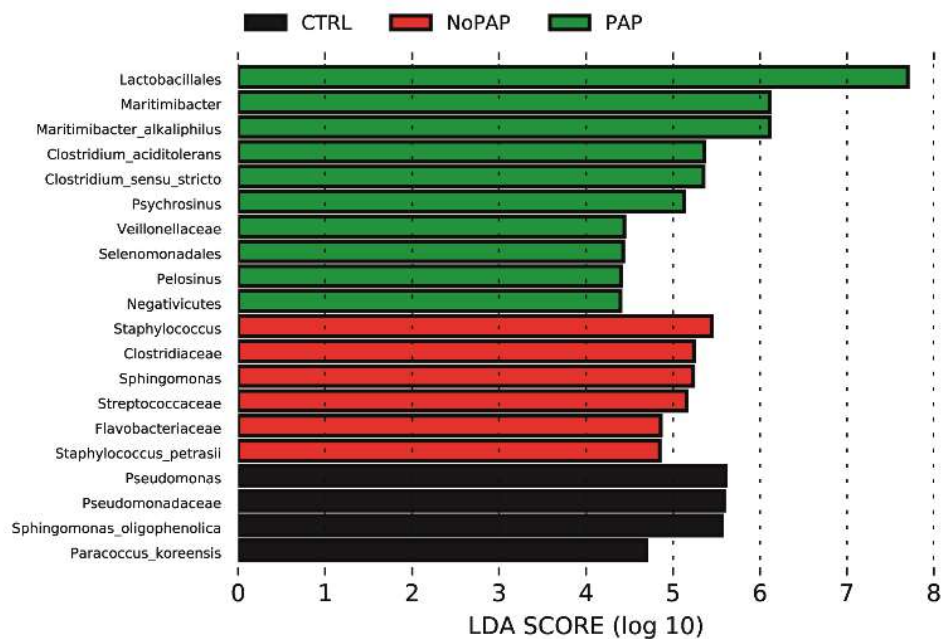

B

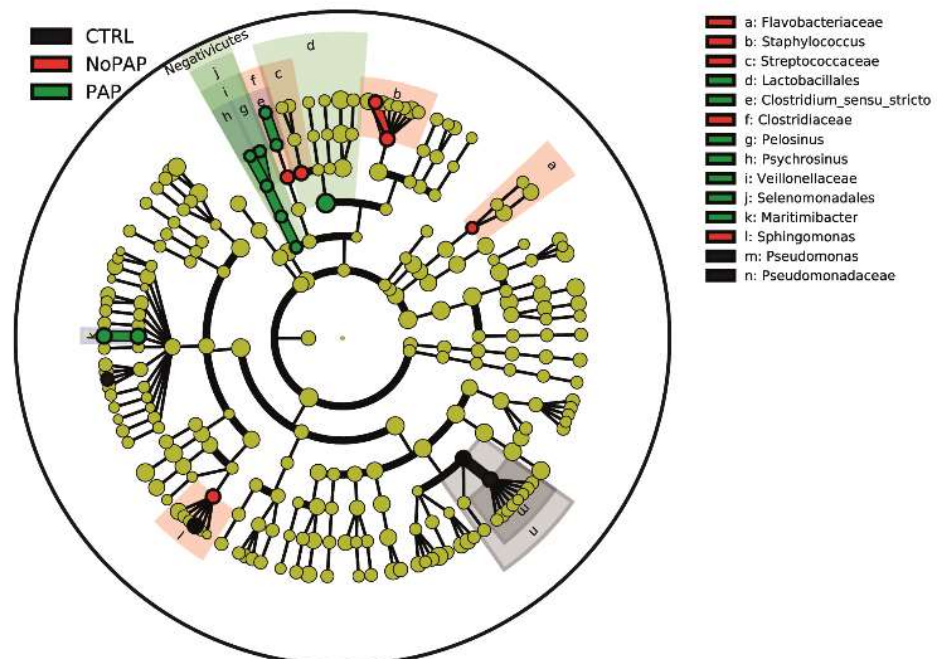

Supplement: Image_4.pdf [file Image_4.pdf]
